# Supplementary material
Source: PubMed Central journal article supplement (PMC3993198)
Supplement: AEM.00192-14_zam999105286so1.pdf [file AEM.00192-14_zam999105286so1.pdf]

## Optimization of gene expression cassette for *M. gryphiswaldense*

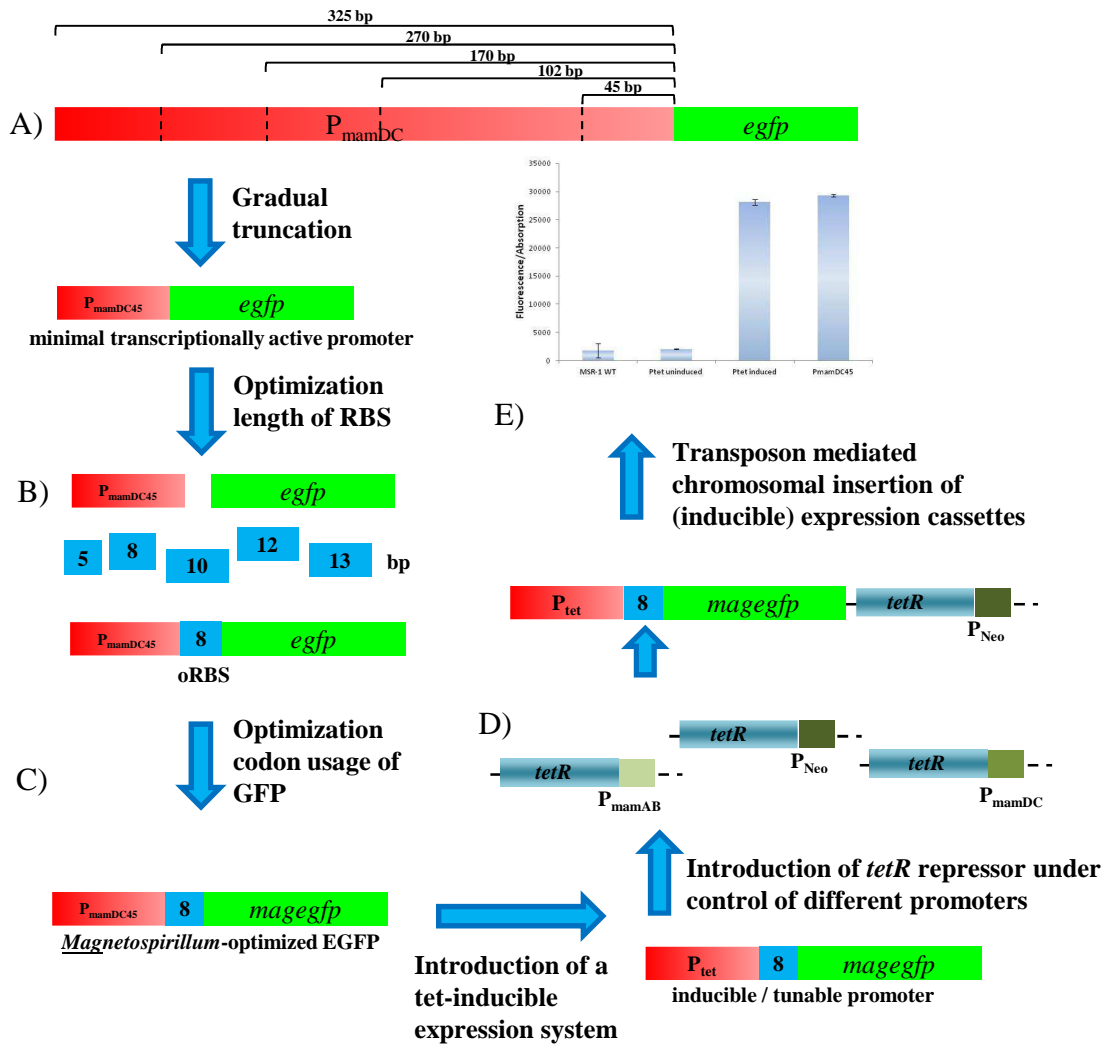

Suppl. Fig. S1: Optimization strategy of (inducible) expression cassette.

CLUSTAL 2.1 multiple sequence alignment

```

non-opt      ATGGTGAGCAAGGGCGAGGAGCTGTTACCGGGGTGGTGCCTATCCTGGTCGAGCTGGAC 60
opt          ATGGTGTGCAAGGGCGAGGAACTGTTACCGGCGTCTGCCGATCCTGGTCGAGCTGGAC 60
*****
non-opt      GCGACGTAAACGGCCACAAGTTCAGCGTGTCCGGCGAGGGCGAGGGCGATGCCACCTAC 120
opt          GCGACGTCAACGGCCATAAGTTCAGCGTGTCCGGCGAGGGCGAAGGGCGAGCCACCTAI 120
*****
non-opt      GGCRAAGCTGACCCTGAAGTTCATCTGCACCACCGGCAAGCTGCCCGTGCCTGGCCACC 180
opt          GGCRAAGCTGACCCTGAAGTTCATCTGCACCACCGGCAAGCTGCCCGTGCCTGGCCACC 180
*****
non-opt      CTCGTGACCACCCTGACCTACGGCGTGCAGTGTTCAGCGGCTACCCCGACCACATGAAG 240
opt          CTCGTGACCACCCTGACCTACGGCGTGCAGTGTTCAGCGGCTACCCCGACCACATGAAG 240
*****
non-opt      CAGCAGACTTCTTCAAGTCCGCCATGCCGAGGCTACGTCCAGGAGCGCACCAITTC 300
opt          CAGCAGACTTCTTCAAGTCCGCCATGCCGAGGCTACGTCCAGGAGCGCACCAITTC 300
*****
non-opt      TTCRAAGGACGACGGCACTACCAAGACCGCGCCGAGGTGAAGTTCGAGGGCGACACCCTG 360
opt          TTCRAAGGACGACGGCACTACCAAGACCGCGCCGAGGTGAAGTTCGAGGGCGACACCCTG 360
*****
non-opt      GTGAACCGCAICGAGCTGAAGGGCAICGACTTCAAGGAGGACGGCAACATCCTGGGGCAC 420
opt          GTCAACCGCAICGAGCTGAAGGGCAICGACTTCAAGGAGGATGGCAACATCCTGGGGCAC 420
*****
non-opt      AAGCTGGAGTACAACCTACAACAGCCACAACGCTATATATCAITGGCCGACAAAGCAGAAGAAC 480
opt          AAGCTGGAAATATAACTATAACTGCGCACACGCTATATATCAITGGCCGACAAAGCAGAAGAAC 480
*****
non-opt      GGCATCAAGGTGAACCTTCAAGATCCGCCACAACATCGAGGACGGCGAGCTGCAGCTCGCC 540
opt          GGCATCAAGGTCAACTTCAAGATCCGCCATAACATCGAGGACGGCTCGGTCCAGCTGGCC 540
*****
non-opt      GACCACTACCAGCAGAACACCCCAICGGCGACGGCCCGGTGCTGCTGCCGACAAACCAAC 600
opt          GACCAITATCAGCAGAACACCCGATCGGCGACGGCCCGGTCTGCTGCCGACAAACCAI 600
*****
non-opt      TACCTGAGCACCCAGTCCGCCCTGAGCAAGACCCCAACGAGAGCCGATCACATGGTC 660
opt          TATCTGTCCACCAGTCCGCCCTGTGCAAGGACCCGAAAGGAGGCGGACCAACATGGTC 660
*****
non-opt      CTGCTGGAGTTCGTGACCGCCGCCGGATCACTCTCGGCAITGGACGAGCTGTACAAGTAA 720
opt          CTGCTGGAGTTCGTGACCGCCGCCGGATCACTCTCGGCAITGGACGAGCTGTATAAGTGA 720
*****

```

**Suppl. Fig S2:** Sequence alignment of non-optimized *egfp* and *Magnetospirillum*-optimized *magegfp* using CLUSTALW (version 2.1, <http://www.ebi.ac.uk/Tools/msa/clustalw2/>). Sequence similarity is 89 %, start and stop codon are overlined.

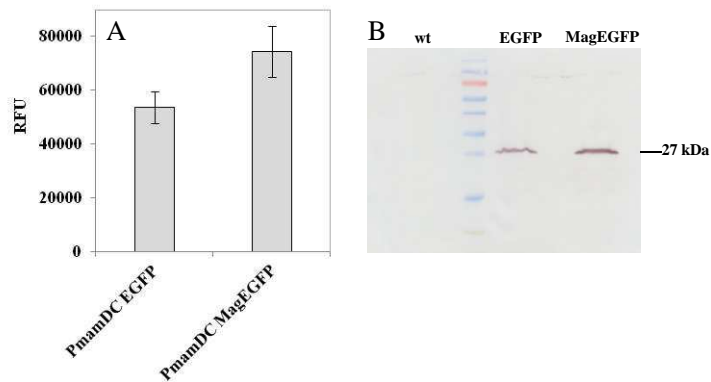

**Suppl. Fig S3:** (A) Fluorescence of *Magnetospirillum*-optimized (MagEGFP) versus non-optimized GFP (EGFP) expressed from the P<sub>mamDC45</sub> promoter. Fluorescence was normalized to the cell density and described as relative fluorescence units (RFU). Error bars represent standard deviations, calculated from three independent experiments. (B) Western blot of whole *M. gryphiswaldense* cells expressing EGFP or MagEGFP from the control of the P<sub>mamDC45</sub>. (Mag)EGFP was detected using rabbit  $\alpha$ GFP IgG as primary, and goat anti-rabbit IgG alkaline phosphatase antibodies as secondary antibody. PageRuler™ Prestained Protein Ladder from fermentas was used as a standard.

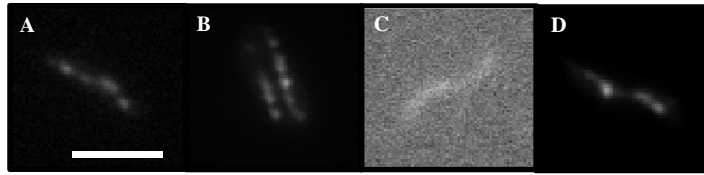

**Suppl. Fig. S4:** Fluorescence micrographs of *M. gryphiswaldense*  $\Delta C$  strains carrying chromosomal insertions of (A)  $P_{\text{mamDC45}}\text{-mamC-magegfp}$  (JH1) (B)  $P_{\text{tet}}\text{-mamC-magegfp}$  (JH2) induced with 70 ng  $\text{ml}^{-1}$  Atet, (C) uninduced and (D)  $P_{\text{mamDC45}}\text{-mamC-egfp-magegfp}$  (JH3) expression cassettes. White bar corresponds to 2  $\mu\text{m}$ .

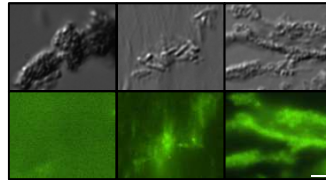

**Suppl. Fig. S5:** Fluorescence and DIC micrographs of isolated magnetosomes from *M. gryphiswaldense* MSR-1  $\Delta C$  (A) JH2 (induced) (B) JH1 and (C) JH3. White bar corresponds to 2  $\mu\text{m}$ .

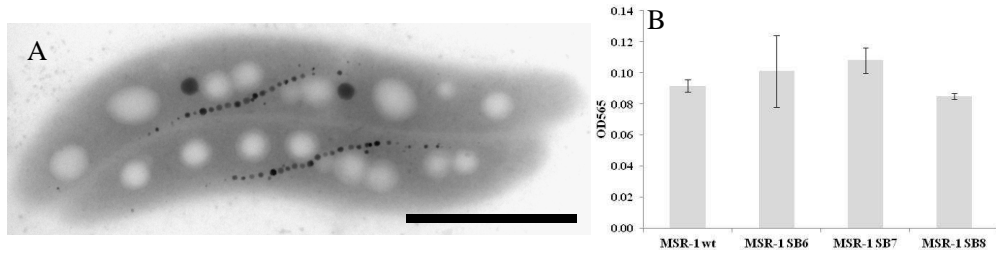

**Suppl. Fig. S6:** A) Transmission electron micrographs of *M. gryphiswaldense* SB6, expressing MagEGFP chromosomally from P<sub>mamDC45</sub>. The black scale bar represents 200 nm. B) Optical density (OD<sub>565</sub>) after overnight growth of strains SB6, SB7 and SB8 in comparison to wt. Error bars represent standard deviations calculated from triplicate cultures, experiment was repeated three times, data is from one representative experiment.

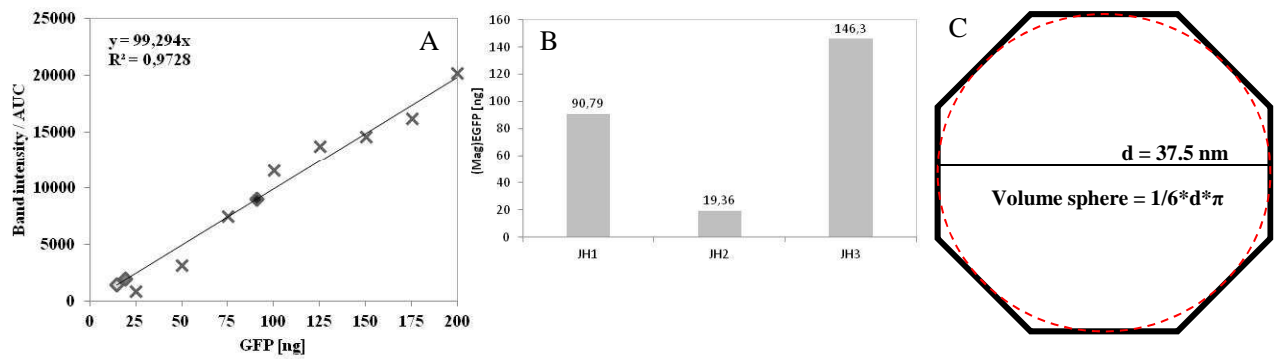

**Suppl. Fig. S7:** (A) Quantitative Western blot of GFP standard curve (marked by "x") and MM samples from strains JH1 (black square), JH2 (grey square) and JH3 (light grey square, 10x diluted). (B) Corresponding GFP protein concentrations of strains JH1, JH2 and JH3. (C) Schematic drawing of approximation of magnetosome size.

**Suppl. Tab. S1:** Plasmids used in this study

| Plasmid name  | Description                                                                                                     | Source or reference                                 |
|---------------|-----------------------------------------------------------------------------------------------------------------|-----------------------------------------------------|
| pJET1.2/blunt | Cloning vector; Amp <sup>R</sup>                                                                                | Fermentas                                           |
| pBBR-MCS2     | Mobilizable broad-host-range vector; Km <sup>R</sup>                                                            | Kovach, M. E., <i>et al.</i> , 1995                 |
| pBAM1         | Km <sup>R</sup> , Amp <sup>R</sup> , oriR6K, <i>tnpA</i>                                                        | Martinez-Garcia, E., <i>et al.</i> , 2011           |
| p11AAGJZC     | Amp <sup>R</sup> , ColE1 ori, oRBS, <i>magegfp</i>                                                              | GeneArt® (Invitrogen), life technologies, Darmstadt |
| pAP150        | pBBR-MCS2, with P <sub>mamDC45</sub> , <i>egfp</i> , terminator-fragment; Km <sup>R</sup>                       | A. Pollithy (unpublished)                           |
| pAP158        | pBBR-MCS2, with P <sub>tet</sub> , <i>egfp</i> , terminator-fragment, P <sub>mamAB</sub> -TetR; Km <sup>R</sup> | A. Pollithy (unpublished)                           |
| pAP159        | pBBR-MCS2, with P <sub>tet</sub> , <i>egfp</i> , terminator-fragment, P <sub>mamDC</sub> -TetR; Km <sup>R</sup> | A. Pollithy (unpublished)                           |
| pAP160        | pBBR-MCS2, with P <sub>tet</sub> , <i>egfp</i> , terminator-fragment, P <sub>Neo</sub> -TetR; Km <sup>R</sup>   | A. Pollithy (unpublished)                           |
| pAP161        | pBBR-MCS2, with P <sub>mamDC325</sub> , <i>egfp</i> , terminator-fragment; Km <sup>R</sup>                      | A. Pollithy (unpublished)                           |
| pAP162        | pBBR-MCS2, with P <sub>mamDC102</sub> , <i>egfp</i> , terminator-fragment; Km <sup>R</sup>                      | A. Pollithy (unpublished)                           |
| pAP163        | pBBR-MCS2, with P <sub>mamDC170</sub> , <i>egfp</i> , terminator-fragment; Km <sup>R</sup>                      | A. Pollithy (unpublished)                           |
| pAP164        | pBBR-MCS2, with P <sub>mamDC270</sub> , <i>egfp</i> , terminator-fragment; Km <sup>R</sup>                      | A. Pollithy (unpublished)                           |
| pLYJ97        | pBBR-MCS2 with <i>gusA</i>                                                                                      | Li, Y., <i>et al.</i> , 2012                        |
| pSB1          | pBBR-MCS2, with P <sub>mamDC45</sub> , <i>magegfp</i> , terminator-fragment; Km <sup>R</sup>                    | this study                                          |
| pSB6          | pBAM1 with P <sub>mamDC45</sub> , <i>magegfp</i> , Km <sup>R</sup> , Amp <sup>R</sup>                           | this study                                          |
| pSB7          | pBAM1 with P <sub>tet</sub> , <i>magegfp</i> , P <sub>Neo</sub> -TetR, Km <sup>R</sup> , Amp <sup>R</sup>       | this study                                          |
| pSB8          | pBAM1 with P <sub>tet</sub> , <i>gusA</i> , P <sub>Neo</sub> -TetR, Km <sup>R</sup> , Amp <sup>R</sup>          | this study                                          |
| pJH1          | pBAM1 with P <sub>mamDC45</sub> , <i>mamC-magegfp</i> , Km <sup>R</sup> , Amp <sup>R</sup>                      | this study                                          |
| pJH2          | pBAM1 with P <sub>tet</sub> , <i>mamC-magegfp</i> , P <sub>Neo</sub> -TetR, Km <sup>R</sup> , Amp <sup>R</sup>  | this study                                          |
| pJH3          | pBAM1 with P <sub>mamDC45</sub> , <i>mamC-magegfp-egfp</i> , Km <sup>R</sup> , Amp <sup>R</sup>                 | this study                                          |

**Suppl. Tab. S2:** Strains used in this study

| Strain                                   | Description                                                                                                                                                                                                  | Source or reference                          |
|------------------------------------------|--------------------------------------------------------------------------------------------------------------------------------------------------------------------------------------------------------------|----------------------------------------------|
| <b><i>Escherichia coli</i></b>           |                                                                                                                                                                                                              |                                              |
| DH5 $\alpha$                             | F <sup>-</sup> <i>supE44</i> $\Delta$ <i>lacU169</i> ( $\Phi$ 80<br><i>lacZDM15</i> ) <i>hsdR17</i> <i>recA1</i><br><i>endA1</i>                                                                             |                                              |
| WM3064                                   | <i>gyrA96</i> <i>thi-1</i> <i>relA1</i><br><i>thrB1004</i> <i>pro</i> <i>thi</i> <i>rpsL</i><br><i>hsdS</i> <i>lacZAM15</i> RP4-1360<br>$\Delta$ ( <i>araBAD</i> )567<br>$\Delta$ <i>dapA1341::[erm pir]</i> | W. Metcalf, unpublished                      |
| BW29427                                  | DAP auxotroph derivative<br>of <i>E. coli</i> strain B2155                                                                                                                                                   | K. Datsenko and B. L.<br>Wanner, unpublished |
| <b><i>Magnetospirillum</i></b>           |                                                                                                                                                                                                              |                                              |
| <b><i>gryphiswaldense</i></b>            |                                                                                                                                                                                                              |                                              |
| <i>M. gryphiswaldense</i> MSR-1<br>R3/S1 | Rif <sup>R</sup> , Sm <sup>R</sup> spontaneous<br>mutant, lab strain                                                                                                                                         | D. Schultheiss, <i>et al.</i> ,<br>2003      |
| <i>M. gryphiswaldense</i> $\Delta$ C     | $\Delta$ <i>mamC</i>                                                                                                                                                                                         | A. Scheffel, <i>et al.</i> , 2007            |
| <i>M. gryphiswaldense</i> (pAP150)       | Km <sup>R</sup> , conjugated with<br>pAP150                                                                                                                                                                  | A. Pollithy, unpublished                     |
| <i>M. gryphiswaldense</i> (pAP160)       | Km <sup>R</sup> , conjugated with<br>pAP160                                                                                                                                                                  | A. Pollithy, unpublished                     |
| <i>M. gryphiswaldense</i> (pSB1)         | Km <sup>R</sup> , conjugated with<br>pSB1                                                                                                                                                                    | this study                                   |
| <i>M. gryphiswaldense</i> MSR-1 SB6      | Km <sup>R</sup> , transposon mutant<br>with inserted <i>magegfp</i><br>from P <sub>mamDC45</sub>                                                                                                             | this study                                   |
| <i>M. gryphiswaldense</i> MSR-1 SB7      | Km <sup>R</sup> , transposon mutant<br>with inserted <i>magegfp</i><br>from P <sub>tet</sub>                                                                                                                 | this study                                   |
| <i>M. gryphiswaldense</i> MSR-1 SB8      | Km <sup>R</sup> , transposon mutant<br>with inserted <i>gusA</i> from<br>P <sub>tet</sub>                                                                                                                    | this study                                   |
| <i>M. gryphiswaldense</i> MSR-1 JH1      | Km <sup>R</sup> , transposon mutant<br>with inserted <i>mamC</i> -<br><i>magegfp</i> from P <sub>mamDC45</sub>                                                                                               | this study                                   |
| <i>M. gryphiswaldense</i> MSR-1 JH2      | Km <sup>R</sup> , transposon mutant<br>with inserted <i>mamC</i> -<br><i>magegfp</i> from P <sub>tet</sub>                                                                                                   | this study                                   |
| <i>M. gryphiswaldense</i> MSR-1 JH3      | Km <sup>R</sup> , transposon mutant<br>with inserted <i>mamC</i> -<br><i>magegfp-egfp</i> from<br>P <sub>mamDC45</sub>                                                                                       | this study                                   |

**Suppl. Tab. S3:** Primers used in this study. Restriction sites indicated in bold

| Primer name            | Sequence                                                            | Restriction site |
|------------------------|---------------------------------------------------------------------|------------------|
| oEGFP BamHI Rev        | cgaac <b>ggatcct</b> cacttatacagctcg                                | BamHI            |
| oEGFP HindIII Fw       | cgget <b>caagctt</b> aggagatcagcatatg                               | HindIII          |
| pBam_pAP160 Fw         | atc <b>gggacccc</b> ttccggctggctggttt                               | SanDI            |
| pBam_ Tet w/o Term Rev | atc <b>gaattc</b> ggcggattgtcctactca                                | EcoRI            |
| pBam_pAP150 Fw         | atc <b>gggacccc</b> ggatcctcacttatacagct                            | SanDI            |
| pBam_DC w/o Term Rev   | gc <b>gaattc</b> ctcagacttttctgctttac                               | EcoRI            |
| GusA BamHI Fw          | gt <b>ggatcccc</b> gggtcattggttgcc                                  | BamHI            |
| GusA NdeI Rev          | tt <b>catatg</b> ttacgtctgtagaaa                                    | NdeI             |
| optGFP San/Bam Fw      | g <b>gggacccc</b> ggatcctcacttatacagctcgcc                          | BamHI/SandDI     |
| optGFP linker Rev      | ggaggcggaggcgggtggcggaggtggcgg <b>aatcgat</b> atg<br>gtgtcgaagggcga | ClaI             |
| mamC ov linker Fw      | cgccaccgctccgct <b>ccatgg</b> ccaatttcttccctca                      | NcoI             |
| mamC NdeI Rev          | t <b>acatag</b> actttcaacttgccg                                     | NdeI             |
| optGFP2x Fw            | agt <b>ggatcct</b> cacttatacagctcgcca                               | BamHI            |
| optGFP2x Rev           | ctgtgcct <b>gcagggc</b> gagatggtgtcgaagggcg                         | PstI             |
| eGFP overl Fw          | atctcgc <b>ctgcagg</b> cacagctgtacagctcgccatgc                      | PstI             |
| mamC_RBS Rev           | c <b>gaagctt</b> aggagatcagcatatgagctttcaact                        | HindIII          |

**Suppl. Tab. S4:** Insertion sites of expression cassettes in *M. gryphiswaldense* strains

| Strain       | Gene                                                | Putative function                                                        |
|--------------|-----------------------------------------------------|--------------------------------------------------------------------------|
| MSR-1 SB6 K7 | MGR_1519                                            | hypothetical protein                                                     |
| MSR-1 SB6 K8 | Inter region<br>between<br>MGR_1092 and<br>MGR_2997 | MGR_1092 - D-alanine-D-alanine ligase<br>MGR_2997 - acyl carrier protein |
| MSR-1 SB7 K1 | MGR_1581                                            | sugar kinase, ribokinase family                                          |
| MSR-1 SB7 K2 | MGR_1519                                            | hypothetical protein                                                     |
| MSR-1 SB8    | MGR_1702                                            | transposase IS3/IS911                                                    |
| MSR-1 JH1    | MGR_3776                                            | insertion element ISR1 from not characterized 10 kDa protein A3          |
| MSR-1 JH2    | MGR_3148                                            | TorC, trimethylaminoxide (TMAO)-reductase I, cytochrom C subunit         |
| MSR-1 JH3    | MGR_612                                             | hypothetical protein                                                     |



## References Supplements:

1. **Kovach ME, Elzer PH, Hill DS, Robertson GT, Farris MA, Roop RM, Peterson KM.** 1995. 4 New Derivatives of the Broad-Host-Range Cloning Vector pBBR1MCS, Carrying Different Antibiotic-Resistance Cassettes. *Gene* **166**:175-176.
2. **Martinez-Garcia E, Calles B, Arevalo-Rodriguez M, de Lorenzo V.** 2011. pBAM1: an all-synthetic genetic tool for analysis and construction of complex bacterial phenotypes. *Bmc Microbiol* **11**.
3. **Li YJ, Katzmann E, Borg S, Schüler D.** 2012. The Periplasmic Nitrate Reductase Nap Is Required for Anaerobic Growth and Involved in Redox Control of Magnetite Biomineralization in *Magnetospirillum gryphiswaldense*. *J Bacteriol* **194**:4847-4856.
4. **Schultheiss D, Schüler D.** 2003. Development of a genetic system for *Magnetospirillum gryphiswaldense*. *Arch Microbiol* **179**:89-94.
5. **Scheffel A, Gärdes A, Grünberg K, Wanner G, Schüler D.** 2008. The major magnetosome proteins MamGFDC are not essential for magnetite biomineralization in *Magnetospirillum gryphiswaldense* but regulate the size of magnetosome crystals. *J Bacteriol* **190**:377-386.
